# 1 Estimating COVID-19 cases and deaths prevented by 2 non-pharmaceutical interventions in 2020-2021, and the 3 impact of individual actions: a retrospective 4 model-based analysis

5 Kathryn R Fair<sup>1,\*</sup>, Vadim A Karatayev<sup>1</sup>, Madhur Anand<sup>1</sup>, Chris T Bauch<sup>2</sup>

6 **1** School of Environmental Sciences, University of Guelph, Guelph, ON, Canada, N1G 2W1

7 **2** Department of Applied Mathematics, University of Waterloo, Waterloo, ON, Canada, N2L

8 3G1

9 \*kafair@uoguelph.ca

## 10 Abstract

11 Simulation models from the early COVID-19 pandemic highlighted the urgency of ap-  
12 plying non-pharmaceutical interventions (NPIs), but had limited empirical data. Here  
13 we use data from 2020-2021 to retrospectively model the impact of NPIs. Our model  
14 represents age groups and census divisions in Ontario, Canada, and is parameterised with  
15 epidemiological, testing, demographic, travel, and mobility data. The model captures how  
16 individuals adopt NPIs in response to reported cases. Combined school/workplace closure  
17 and individual NPI adoption reduced the number of deaths in the best-case scenario for  
18 the case fatality rate (CFR) from 174,411 [CI: 168,022, 180,644] to 3,383 [CI: 3,295,  
19 3,483] in the Spring 2020 wave. In the Fall 2020/Winter 2021 wave, the introduction  
20 of NPIs in workplaces/schools reduced the number of deaths from 17,291 [CI: 16,268,  
21 18,379] to 4,167 [CI: 4,117, 4,217]. Deaths were several times higher in the worst-case  
22 CFR scenario. Each additional 7 – 11 (resp. 285 – 452) individuals who adopted NPIs  
23 in the first wave prevented one additional infection (resp., death). Our results show that  
24 the adoption of NPIs prevented a public health catastrophe.

## 25 Introduction

26 Non-pharmaceutical interventions (NPIs) such as school and workplace closure, limiting group  
27 sizes in gatherings, hand-washing, mask use, physical distancing, and other measures are es-  
28 sential for pandemic mitigation in the absence of a vaccine [1]. Scalable NPIs, in particular,  
29 are measures that can be taken up by the entire population in case containment strategies have

30 failed [2]. These measures have been applied extensively during the 2019 coronavirus disease  
31 (COVID-19) pandemic in order to reduce severe outcomes [3]. Given the extensive social and  
32 economic consequences of the COVID-19 pandemic, there is significant value in assessing how  
33 many cases, hospitalizations, and deaths were prevented by pandemic mitigation measures that  
34 relied upon scalable NPIs.

35 Assessments of the effectiveness of NPIs sometimes rely upon comparing health outcomes  
36 in countries that did not implement certain NPIs, to those that did [4]. However, it may be  
37 difficult to control for confounding factors in cross-country comparisons such as differing social  
38 and economic circumstances. Another approach is to monitor outcomes longitudinally in a  
39 given population as they respond to a timeline of changing NPIs [5].

40 However, empirical approaches to predicting the number of COVID-19 cases in the absence  
41 of interventions are difficult or impossible since, in every country, governments implemented  
42 control measures and/or the population responded to the presence of the virus. Even in the  
43 case of Sweden, whose government famously adopted a *de facto* herd immunity strategy [6],  
44 the population exhibited enormous reductions in mobility in March and April 2020 (27%, 61%,  
45 and 82% reduced time spent at retail/recreation destinations, transit stations, and workplaces,  
46 respectively, at their maximal values) [7]. However, simulation models can be useful the task of  
47 estimating the number of cases in the absence of interventions, as well as many other questions  
48 concerning SARS-CoV-2 transmission and COVID-19 disease burden [8–18]. Simulation models  
49 that were developed early during the pandemic made projections for such scenarios, but required  
50 rational assumptions about crucial parameter values in the absence of empirical data specific  
51 to COVID-19 [9, 16, 18].

52 Here we adopt a retrospective approach of fitting a simulation model to empirical data  
53 from March 2020 to February 2021 in order to estimate how many COVID-19 cases and deaths  
54 would have occurred in the province of Ontario, Canada in the absence of NPIs. After fitting  
55 the model to empirical data, we relaxed the parameters relating to NPIs to predict what might  
56 have happened in their absence, or in the presence of only a selection of certain NPIs. The  
57 model includes the census area and age structure of Ontario, as well as travel between census  
58 areas. Moreover, the model accounts for population behavioural responses to pandemic waves:  
59 without volitional population uptake of NPIs, “flattening the curve” may not have been possible  
60 [17].

## 61 Results

### 62 Model overview

63 To capture the social-epidemiological dynamics of severe acute respiratory syndrome coron-  
64 avirus 2 (SARS-CoV-2) transmission and COVID-19 cases, we developed a stochastic compart-  
65 mental model incorporating age and spatial structure (Figure 1). Transmission dynamics in  
66 the population of each census region are described by a Susceptible (S), Exposed (E), Pre-  
67 symptomatic and infectious (P), Symptomatic and infectious (I), Asymptomatic and infectious  
68 (A), Removed (R) natural history. Populations in different regions are connected through com-  
69 muter travel. Transmission is reduced through school and/or workplace closure and infection  
70 control efforts in those settings, under direction from public health authorities. However, trans-  
71 mission is also reduced outside of school and work settings as a result of volitional efforts by  
72 individuals to adopt NPIs, including measures such as physical distancing, hand-washing, and  
73 mask wearing (Supplementary information, Figure S1). This occurs in proportion to the daily  
74 incidence of reported cases. Transmission rates are region-specific to account for regional differ-  
75 ences in contact patterns due to population density and other factors, and were also modified  
76 by seasonality in transmission. Age classes varies in their relative susceptibility. Age-specific  
77 testing rates increase over time from initially low levels in March 2020 to a constant level (with  
78 the date this is attained varying by age class).

79 Using Ontario data, we estimated deaths resulting from COVID-19 under best-case and  
80 worst-case scenarios for the crude case fatality ratio (CFR). In the best-case scenario we as-  
81 sume that CFR computed from the historical for the first and second waves also applies in  
82 counterfactual scenarios where the case incidence was much higher due to relaxing NPIs. In  
83 the worst case, we extrapolate the observed empirical relationship between case incidence and  
84 CFR to consider the possibility that the CFR increases with case numbers [19], due to increased  
85 strain on the healthcare system [20] (Supplementary information, Figure S2).

86 Epidemiological [21–23], testing [21–23], demographic [24], travel [25], and mobility data  
87 [7] for Ontario were used to parameterise the model. We employed a 2-stage non-linear opti-  
88 mization process to fit cases by age class at the provincial level, and total cases at the Public  
89 Health Unit (PHU) level [26–28]. The first stage used a global algorithm, with the results of  
90 that fitting input as the initial values for the second-stage local optimization. This allowed  
91 us to estimate the baseline transmission rate, as well as how it responded to school/workplace  
92 closure, and how many individuals adhered to NPIs in response to reported case incidence. Full

93 details on the model structure and parameterisation appear in the Methods.

## 94 **Scenarios and outcomes analyzed**

95 We generated model outputs for reported COVID-19 cases and deaths over three time periods.  
96 The first time period covers the first wave from 10 March 2020 to 15 August 2020. The second  
97 time period from 12 June 2020 to Feb 28 2021 covers Ontario’s reopening during the first  
98 wave and the subsequent second wave. These periods are studied separately because the first  
99 and second waves differed considerably in terms of their epidemiology, disease burden, and  
100 interventions. These two time periods were analyzed retrospectively: the empirical data from  
101 these time periods were used to fit the model.

102 In the first time period, Ontario implemented school and workplace closure, and a significant  
103 proportion of the population adhered to recommended NPIs. For the first wave, we projected  
104 what might have happened under three counterfactual scenarios: (1) school/workplace closures  
105 were enacted but no individuals adhered to any other NPIs, (2) school/workplace closures were  
106 not enacted but individuals adhered to other NPIs in proportion to reported case incidence,  
107 and (3) school/workplace closures were not enacted and no individuals adhered to NPIs (a “do  
108 nothing” scenario).

109 In the second time period, Ontario closed schools and workplaces in late 2020/early 2021,  
110 and began re-opening in February 2021, but with mandatory NPIs in place to combat transmis-  
111 sion, such as requiring mask use in schools. We considered two counterfactual scenarios for the  
112 re-opening phase in February 2021: (1) reopening does not occur (school/workplace closures  
113 continues indefinitely), and (2) schools and workplaces are reopened without NPIs in place.  
114 Individual NPI adherence varied in response to cases in homes and other locations for all of  
115 these scenarios. We also note that all of our scenarios for the second time period incorporated  
116 the first provincial imposition of control measures in Spring 2020 followed by the first provincial  
117 re-opening in Summer 2020.

118 For the first time period and with reference to the average population uptake of NPIs during  
119 those periods, we also estimated how many additional individuals must adopt NPIs in order to  
120 prevent one additional case, or one additional death (i.e., incremental cases and death prevented  
121 by NPI uptake). These measures gauge the impact of individual-level efforts on the course of  
122 the pandemic. The numbers are calculated as an incremental quantity because the incremental  
123 effectiveness of an individual choosing to adopt NPIs depends upon how many other individuals

124 in the population are already doing so, on account of their impact on community transmission.

## 125 **Cases and deaths prevented by NPIs in the first and second waves**

126 Results for our three counter-factual scenarios in the first wave highlight the key role that  
127 NPIs played in limiting the spread of SARS-CoV-2, and also show how school/workplace clo-  
128 sures interact with individual-level behaviours concerning NPIs (Figure 2). The actual number  
129 of daily reported cases peaked at 640 in Ontario in April 2020, and the modelled time series  
130 of cases follows the empirical epidemic curve (Figure 2a, inset). However, in the absence of  
131 both school/workplace closure and individual uptake of NPIs, the model predicts that daily  
132 number of reported cases would have peaked at 65,000 in May 2020. Allowing for either  
133 school/workplace closure or individual uptake of NPIs reduces this peak considerably, although  
134 the peaks are still large compared to the factual (historical) scenario where both were applied.

135 Under the best case scenario for the CFR, the first wave would have resulted in 174,411  
136 [CI:168,022, 180,644] deaths in the absence of both school/workplace closure and individual  
137 adherence to NPIs (Figure 2b). This number greatly exceeds the 3,383 deaths that actually  
138 occurred between 10 March and 15 August 2020 due to lockdown and population adoption of  
139 NPIs [29]. The worst-case scenario for deaths is even higher under the “do nothing” scenario  
140 (Figure 2c), on account of the unmanageable surge in cases causing a heightened CFR. However,  
141 applying either school/workplace closure or individual uptake of NPIs significantly reduces the  
142 number of deaths in both worst- and best-case scenarios. The reductions are greater for applying  
143 only individual-level NPI measures than for applying school/workplace closure. This is because  
144 school/workplace closure in our model only affects school-age children and working-age adults  
145 working in non-essential businesses, whereas individual adoption of NPIs in our model spans  
146 all employment sectors in all age groups.

147 These findings are qualitatively unchanged for the second wave, except that the difference in  
148 cases and deaths across the scenarios is not as large, since we did not evaluate a “do nothing”  
149 scenario. (Figure 3). As before, cases and deaths are considerably higher when NPI use is  
150 limited (in this case, does not occur in workplaces/schools). Both the empirical epidemic curve  
151 and the modelled epidemic curves share the feature of a relatively slow rise to a peak, followed  
152 by a relatively rapid drop afterwards (Figure 2a). This is due to the combined effect of timing  
153 of school/workplace closure, behavioural response, and seasonality in the transmission rate.

## 154 **Impact of individual-level efforts**

155 We estimated how many additional individuals must adopt NPIs in order to prevent one ad-  
156 ditional case, and one additional death, given what percentage of the population is already  
157 adherent to NPIs. We estimated this under both best-case and worst-case scenarios for the  
158 CFR. When the percentage of the population already adherent to NPIs is within empirically  
159 valid ranges for the first wave (shaded regions in Figure 4), we estimated that every 7 to 11  
160 individuals who adopted NPIs prevented a single SARS-CoV-2 infection. Similarly, every 285  
161 to 452 (respectively, 159 to 280) individuals who adopted NPIs prevented a single COVID-19  
162 death in the best-case (respectively, worst-case) scenarios.

163 In the extreme case where a very high percentage of the population is already adherent to  
164 NPIs, the incremental number of individuals who must adhere to NPIs to prevent one case  
165 or death increases dramatically. This is expected, since high uptake of NPIs can reduce case  
166 incidence to very low levels, and thus reduce the incremental benefit of a few more individuals  
167 adopting NPIs. Similarly, in the other extreme when few individuals in the population have  
168 adopted NPIs, the incremental benefit of each additional individual who adopts NPIs is higher.

## 169 **Discussion**

170 This suite of simulations informs a picture of how NPIs—particularly the combination of gov-  
171 ernment mandated measures such as school/workplace closure and volitional individual level  
172 actions such as physical distancing and hand-washing—strongly mitigated COVID-19 cases and  
173 deaths across both age and census area in Ontario. School/workplace closure or individual-level  
174 NPIs implemented on their own would also have reduced both cases and deaths considerably,  
175 although the absolute numbers would still have been large.

176 The number of deaths averted by NPIs was particularly large in the first wave. Our projec-  
177 tion of 174,411 deaths in the “do nothing” scenario for interventions and the best-case scenario  
178 for the CFR is plausible: supposing that 70% of Ontario’s 14.6 million people had been infected  
179 in a “do nothing” scenario, the adjusted CFR for Spring 2020 of 1.6% [19] would have resulted  
180 in 163,520 deaths. Moreover, the actual number of deaths would likely have been much higher  
181 than suggested by our best-case scenario. The adjusted CFR of 1.6% was estimated from a  
182 population where the ICU capacity in Spring 2020 was not greatly exceeded [29]. Therefore,  
183 the adjusted CFR would have been much higher in a population contending with a massive

184 surge in cases.

185 Our results on the number of individuals who must adopt NPIs to prevent one case or  
186 death increased dramatically with the percentage of the population already adhering to NPIs  
187 (Figure 4). As a result, an individual in a population where most others have already adopted  
188 NPIs has a reduced personal incentive to practice NPIs, since the number of cases (and thus  
189 their perceived infection risk) is lowered. This suggests the possibility of a free-rider effect  
190 whereby non-mitigators gain the benefits of reduced community spread without contribute to  
191 infection control [30], although social norms can curb this effect [31, 32].

192 Our model made several simplifying assumptions that could influence results and/or limit  
193 the conditions under which the model can be used. For instance, as our model describes  
194 community spread, we are not explicitly accounting for how transmission within congregate  
195 living settings, long-term care homes, etc. can cause case numbers to increase rapidly [29, 33,  
196 34]. As well, our simplification of Ontario’s tiered system for NPIs at the level of individual  
197 public health units [35] into a single aggregate “open with NPIs in place” state may lead us to  
198 over/underestimate cases at the PHU level, if the tier that PHU is in is more/less restrictive  
199 than the aggregate state.

200 It is well known that mathematical models can be used for forecasting purposes, but they  
201 can also be valuable for conveying insights, or for aspirational purposes. In the latter case,  
202 mathematical models can motivate the uptake of behaviours to avoid the worst-case scenarios  
203 scenarios predicted by the model. The prosocial preferences that humans often adopt toward  
204 infectious disease control [31, 32] suggest that this use of models can be effective. Early mathe-  
205 matical models developed during the COVID-19 pandemic showed us what might happen if we  
206 chose not to mitigate the pandemic. Our retrospective analysis that uses data from the past  
207 year confirms that we prevented a very large loss of life by our decision to take action, and that  
208 each individual person who chose to adopt NPIs helped prevent both cases and deaths.

## 209 **Methods**

### 210 **Base model**

211 Our model, modified from [16], captures transmission dynamics for SARS-CoV-2 within  
212 Ontario, Canada. Age structure is introduced, with age classes 1-5 respectively represent 0-19  
213 years old, 20-39 years old, 40-59 years old, 60-79 years old, and 80+ years old. The model also

214 includes mechanisms for testing, individual NPI adherence, and the implementation of closures  
215 (of schools and workplaces).

216 We describe the transmission dynamics according to a *SEPAIR* disease progression. In-  
217 dividuals are classed according to their epidemiological status; susceptible to infection (*S*),  
218 exposed i.e. infected but not yet infectious (*E*), pre-symptomatic and infectious (*P*), asymp-  
219 tomatic i.e. infectious without ever developing symptoms (*A*), symptomatic and infectious (*I*),  
220 or removed i.e. no longer infectious (*R*). We also incorporate testing for the virus, with individ-  
221 uals classed as having either a known (*K*) or unknown (*U*) infection status. Testing occurs for  
222 symptomatic, pre-symptomatic, and symptomatic individuals and the outcome of these tests  
223 becomes known with some daily probability.

224 Ontario's population is distributed across 49 census divisions, hereafter referred to as regions  
225 [25]. Within our model, each region contains a population with the same size as the census  
226 division it represents. Each day within the simulation begins with every individual within age  
227 class *i* in region *j* travelling to region *k* for the day, with some probability  $\nu_i m_{jk}$ . Individuals  
228 who travel to another region experience any transmission events in the region they are visiting.  
229 At the end of the day, these individuals return to region *j*.

230 The travel matrix,  $M = [m_{jk}]$  contains empirical data on the frequency of travel between  
231 regions [25]. We use a matrix  $M^* = [2m_{jk}]$  as input to our model, since the data collected  
232 considers only individuals aged 15 and up who commute from their home to their place of work  
233 and thus excludes travel by unemployed individuals and those under age 15, as well as travel  
234 undertaken for other reasons (shopping, athletics, social events, etc.). We supplement  $M^*$   
235 with age-specific travel rates, assuming that young/old individuals travel less frequently than  
236 working-age individuals. Individuals in age classes 1,4,5 (ages 0-19, 60+) reduce their travel by  
237 a factor of  $\nu_i = \nu_0$ , with  $\nu_i = 0$  for age classes 2,3 (ages 20-39, 40-59).

238 As 81% of reported COVID-19 cases are mild, we assume infected individuals reduce their  
239 travel by a factor  $r = 0.19$  [36]. Additionally, individuals who test positive for COVID-19  
240 reduce their travel by a factor  $\eta = 0.8$  [18, 37], so the combined reduction in travel for an  
241 infected individual in age classes 1,4 or 5 who has tested positive is  $(1 - \nu_i)(1 - r)(1 - \eta)$ .  
242 When a region closes its schools, the rate of travel to that region is reduced by a factor  $\epsilon_s$ , with  
243 a similar reduction,  $\epsilon_w$ , when its workplaces are closed. When both are closed, the combined  
244 reduction in travel is  $(1 - \epsilon_s)(1 - \epsilon_w)$ . Similarly, if a region has its schools or workplaces open,  
245 but with NPIs in place, travel is reduced by a factor of  $\delta_s \epsilon_s$  and of  $\delta_w \epsilon_w$  respectively. These  
246 parameters ( $\epsilon_w, \epsilon_s, \delta_w, \delta_s$ ) are explained in further detail below, as they are also used to describe



247 the efficacy of NPIs in reducing contacts in schools and workplaces.

248 As noted in [16], there is a risk of overestimating the effect of travel, since we assume that all  
249 individuals within an age class have an equal likelihood of travelling to another region on any  
250 given day. Within real-world populations, the same individuals will tend to travel consistently  
251 (e.g. will travel frequently, to the same region, and interact with the same group of contacts).  
252 Despite this, it is preferable to err on the side of over-estimation, as travel can substantially  
253 impact spread of SARS-CoV-2 through the importation of the virus to regions with few or no  
254 cases.

255 Each individual,  $i$ , has a state,  $\{D_i^j, T_i^j\}$  based on their age class,  $j \in \{1, 2, 3, 4, 5\}$ , epidemi-  
256 ological status,  $D_i^j \in \{S_i^j, E_i^j, P_i^j, A_i^j, I_i^j, R_i^j\}$ , and testing status,  $T_i^j \in \{U_i^j, K_i^j\}$ . An individual  
257 with age class  $j$ , epidemiological status  $D_i^j$ , and either testing status is  $\{D_i^j, \cdot\}$ , similarly for  
258  $\{\cdot, T_i^j\}$ . Within region  $k$  on day  $t$ ,  $P_{t,k}^{D^j T^j}$  is the number of individuals with age class  $j$  and state  
259  $\{D_i^j, T_i^j\}$ ,  $P_{t,k}^{DT}$  is the number of individuals across all age classes with state  $\{D_i, T_i\}$ , and  $P_{t,k}$   
260 is the total population size.

261 Every day, states for individuals with age class  $j$  in region  $k$  are updated according to the  
262 following steps:

- 263 1. Exposure: With probability  $\lambda_{j,k}(t)$ ,  $\{S^j, \cdot\}$  individuals are exposed to SARS-CoV-2 and  
264 shift to  $\{E^j, \cdot\}$ .
- 265 2. Onset of infectious period: With probability  $(1 - \pi)\alpha$ ,  $\{E^j, \cdot\}$  individuals become pre-  
266 symptomatic and infectious and transition to  $\{P^j, \cdot\}$ , or alternatively (with probability  
267  $\pi\alpha$ ) become asymptomatic and infectious and transition to  $\{A^j, \cdot\}$ .
- 268 3. Onset of symptoms: With probability  $\sigma$ , individuals in  $\{P^j, \cdot\}$  become symptomatic and  
269 shift to  $\{I^j, \cdot\}$ .
- 270 4. Testing: With probability  $\tau_{k,I^j}$ , individuals in  $\{I^j, U^j\}$  are tested and shift to  $\{I^j, K^j\}$ ,  
271 similarly for  $\tau_{k,P^j}$  and  $\tau_{k,A^j}$ .
- 272 5. Removal: With probability  $\rho$ , individuals in  $\{I^j, \cdot\}$  and  $\{A^j, \cdot\}$  cease to be infectious and  
273 are removed to  $\{R^j, \cdot\}$ .

274 During the onset of the infectious period, newly infected individuals are assigned as super-  
275 spreaders with probability  $s = 0.2$  [38]. Super-spreaders are denoted with the subscript  $s$ , while  
276 non-super-spreaders are denoted by  $ns$ , creating sub-divisions within  $P^j$ ,  $A^j$  and  $I^j$  given by

277  $P_s^j, P_{ns}^j, A_s^j, A_{ns}^j, I_s^j, I_{ns}^j$ . The probability of a super-spreader infecting others is  $(1 - s)/s$   
278 higher than the probability of a non-super-spreader doing so. Several other factors also impact  
279 the infection probability. First, the individuals contacts; both those in schools and workplaces  
280 (limited by closures) and those in homes (unaffected by closures). Second; the prevalence of  
281 the virus within the population. Third; the effectiveness of closures and individual adherence  
282 to NPIs in reducing transmission.

283 Individuals risk contracting or transmitting SARS-CoV-2 when they interact with others.  
284 Four possible locations for interactions are assumed; schools ( $s$ ), workplaces ( $w$ ), homes ( $h$ ),  
285 and other ( $o$ ). For each location, a contact matrix  $N^l = [n_{ij}^l]$ , where  $l \in \{s, w, h, o\}$ , contains  
286 information on age-stratified contact frequencies. Each  $n_{ij}^l$  indicates the relative frequency with  
287 which age class  $i$  has contacts in age class  $j$ , normalized using the the highest total number  
288 of contacts (across all locations) for a single age class. Matrices (Supplementary information,  
289 Figure S4) are generated by aggregating Canada-specific data from [39]. The 75-80 age class in  
290 [39] is used as a proxy for our 80+ age class. When aggregating, we weight the data from each  
291 5-year age class by the proportion of Ontario's population that falls within that age-range [24].

Closures reduce contacts in schools ( $s$ ), workplaces ( $w$ ). NPIs introduced to combat SARS-CoV-2 transmission in workplaces and schools as they reopen will also reduce contacts, to a lesser extent.  $C_k^l(t)$  controls the measures in place for workplaces ( $l = w$ ) or schools ( $l = s$ ) in region  $k$ :

$$C_k^l(t) = \begin{cases} 0 & \text{if } l \text{ are completely open,} \\ \delta_l \epsilon_l & \text{if } l \text{ are open with NPIs in place,} \\ \epsilon_l & \text{if } l \text{ are closed.} \end{cases} \quad (1)$$

292 Parameters  $\epsilon_{w,s}$  represent the efficacy of closures in workplaces, and schools. Additionally,  
293  $\delta_{w,s} < 1$  control how effective NPIs in workplaces and schools are, in comparison to a closure.

All remaining contacts are assumed to occur at home ( $h$ ) or in other locations ( $o$ ), where contacts may be reduced through individual adherence to NPIs. The maximum efficacy of NPIs in homes is denoted by  $\epsilon_h$ , similarly for other locations by  $\epsilon_o$ . In region  $k$ , the level of individual adherence to NPIs in these locations,  $\chi_k(t)$ , is a function of perceived risk [40, 41], based on the prevalence of confirmed cases within the region's population, and of the presence/absence of stay-at-home orders in the region, according to

$$\chi_k(t) = 1 - e^{-(\omega(t)(P_{t,k}^+/P_{t,k})+L(t))} \quad (2)$$

where  $P_{t,k}^{AK} + P_{t,k}^{IK} = P_{t,k}^+$  indicates the number of active confirmed cases in the region and

$$L(t) = \begin{cases} 0 & \text{if no stay-at-home orders,} \\ L_0 & \text{if stay-at-home orders in place,} \end{cases} \quad (3)$$

with  $L_0$  capturing the extent to which stay-at-home orders impact NPI adherence. The risk perception coefficient,  $\omega(t)$ , changes over time, beginning to decrease during the second wave according to

$$\omega(t) = \begin{cases} \omega_0 & \text{if } t < t_d \\ \omega_0 e^{-\zeta(t-t_d)} & \text{if } t \geq t_d \end{cases} \quad (4)$$

294 where  $\omega_0$  is the base risk perception coefficient,  $t_d$  corresponds to August 15, 2020 and  $\zeta$  controls  
295 the decay of  $\omega(t)$  over time.

296 Allowing  $\omega(t)$  to change over time captures both the idea that perceived risk changes as  
297 new information about SARS-CoV-2 and COVID-19 becomes available, and that, though not  
298 explicitly modelled, the accumulating costs (economic, social, etc.) associated with NPI ad-  
299 herence may lead individuals to reduce their level of adherence [42, 43]. Ontario-specific data  
300 suggests it is plausible to assume these factors are influencing NPI adherence. As time passes,  
301 the extent to which mobility in retail and recreation locations [7] (our proxy for NPI adherence)  
302 decreases when active cases are high is lessened (Supplementary information, Figure S1), in the  
303 absence of stay-at-home orders in one or more PHU (i.e. prior to 14 January 2021). Once  
304 stay-at-home orders have been introduced, reductions in mobility for a given level of active  
305 cases are larger.

306 Additionally, we estimate a provincial weighted mean value for  $\omega(t)$  (Supplementary in-  
307 formation, Figure S1) using Ontario-specific data, which begins to decay around mid-August  
308 2020 (we choose this as 15 August 2020 for simplicity). The increase in the estimated  $\omega(t)$   
309 value occurring in late December 2020 (prior to the stay-at-home orders) is likely caused by a  
310 combination of changing mobility patterns over the winter holiday period, and the declaration  
311 of a province-wide shutdown on 26 December 2020. We emphasize that this is a rough estimate  
312 of  $\omega(t)$ , as there is not a one-to-one relationship between PHU and the regions reported in the  
313 mobility data, and include it only to illustrate the assumed trend over time.

Accounting for the effects of closures and individual NPI adherence, the fraction of contacts

in age class  $j$  which remain for individuals in age class  $i$  at time  $t$  in region  $k$  is:

$$F_{ij,k}(t) = n_{ij}^w (1 - C_k^w(t)) + n_{ij}^s (1 - C_k^s(t)) + n_{ij}^h (1 - \epsilon_h \chi_k(t)) + n_{ij}^o (1 - \epsilon_o \chi_k(t)). \quad (5)$$

The transmission probability for non-super-spreaders ( $\{P_{ns}, \cdot\}, \{A_{ns}, \cdot\}, \{I_{ns}, \cdot\}$ ) is  $\beta_{D_{ns}} = \beta_0^D$ , while for super-spreaders ( $\{P_s, \cdot\}, \{A_s, \cdot\}, \{I_s, \cdot\}$ ) we set  $\beta_{D_s} = \beta_0^D(1 - s)/s$ . Individuals who test positive for COVID-19 reduce their contacts by a fraction  $\eta$ , such that while  $f_{T=U} = 1$ ,  $f_{T=K} = 1 - \eta$ , where  $\eta = 0.8$  [18, 37]. The daily probability of a susceptible individual in age class  $i$  becoming infected in region  $k$ , stated as 1 less the probability of the individual not becoming infected, is:

$$\lambda_{i,k}(t) = 1 - \prod_{D^j, T^j} [1 - F_{ij,k}(t) f_T \beta_{i,k}^D(t)]^{P_{t,k}^{*D^j T^j}} \quad (6)$$

where  $\beta_{i,k}^D(t)$  is the probability of an individual in region  $k$  with epidemiological state  $D$  transmitting SARS-CoV-2 to a susceptible individual in age class  $i$ , at time-step  $t$ . This probability is:

$$\beta_{i,k}^D = \xi_k \gamma_i \beta_0^D \left[ 1 + B \cos \left( \frac{2\pi}{365} (t + \phi) \right) \right] \quad (7)$$

314 where  $\gamma_i$  is an age-specific susceptibility coefficient,  $\xi_k$  is a PHU-specific transmission modi-  
 315 fier, and seasonality is controlled by  $B$  and  $\phi$  so transmission probability peaks sometime in  
 316 fall/winter and attains its lowest value in spring/summer [44]. Due to epidemiological data  
 317 being reported at the PHU level  $\xi_k$  values are PHU-specific not region-specific and all regions  
 318 within the same PHU will have identical  $\xi_k$  values. The starred notation in  $P_{t,k}^{*D^j T^j}$  indicates  
 319 the number of individuals with state  $\{D^j, T^j\}$  in region  $k$  at time  $t$  after adjusting for travel.

Based on examination of Ontario-specific data on tests completed per day [22], we assume symptomatic testing probability for individuals in age class  $i$  changes over time according to

$$\tau_{I_i}(t) = \begin{cases} \tau_{I_0} & \text{if } t < t_{n=50} \\ \tau_{I_{\max}} - (\tau_{I_{\max}} - \tau_{I_0}) e^{-\psi_i(t-t_{n=50})} & \text{if } t \geq t_{n=50} \end{cases} \quad (8)$$

320 where we have initial,  $\tau_{I_0}$ , and maximum  $\tau_{I_{\max}}$  testing probabilities that hold across all age  
 321 classes. For each age class,  $i$ , we fit values for the parameter,  $\psi_i$ , controlling the rate at which  
 322 the testing probability increases over time. Age-specific testing rates are assumed, as factors  
 323 such as targeted testing in long-term care homes and schools, and the severity of symptoms in

324 different age groups can influence the likelihood that a person of a given age is tested [45–47].

We assume that pre-symptomatic and asymptomatic individuals experience a lower testing probability than symptomatic individuals, as provincial testing guidelines limit asymptomatic testing to high risk individuals and those in groups targeted for testing [45]. We set  $\tau_{P_{0_i}} = \tau_{A_{0_i}} = 0 \forall i$ . The testing probability for pre-symptomatic individuals in age class  $i$  is:

$$\tau_{P_i}(t) = \begin{cases} 0 & \text{if } t < t_{n=50}, \\ \tau_{P_{\max}} (1 - e^{-\psi_i(t-t_{n=50})}) & \text{if } t \geq t_{n=50}. \end{cases} \quad (9)$$

Similarly, for asymptomatic individuals we have a testing probability:

$$\tau_{A_i}(t) = \begin{cases} 0 & \text{if } t < t_{n=50}, \\ \tau_{A_{\max}} (1 - e^{-\psi_i(t-t_{n=50})}) & \text{if } t \geq t_{n=50}. \end{cases} \quad (10)$$

For simplicity we assume  $\tau_{P_{\max}} = \tau_{A_{\max}} = \kappa\tau_{I_{\max}}$ , where  $\kappa \in (0, 1)$  and thus

$$\tau_{P_i}(t) = \tau_{A_i}(t) = \begin{cases} 0 & \text{if } t < t_{n=50} \\ \kappa\tau_{I_{\max}} (1 - e^{-\psi_i(t-t_{n=50})}) & \text{if } t \geq t_{n=50} \end{cases} \quad (11)$$

325 To implement key events within simulations, and compare our results to empirical data, we  
 326 use the day the 50th case was detected in Ontario ( $t_{n \geq 50}$ ), 10 March 2020 [21], as our reference  
 327 point. All time-steps (days) within simulations are measured in relation to  $t_{n \geq 50}$ . Ontario  
 328 declared a state of emergency on 17 March 2020, and we assume no NPI adherence occurred  
 329 prior to this ( $\omega = 0$  for  $t - t_{n \geq 50} < 7$ ). Within the model, the measures (closures, reopenings)  
 330 for each PHU apply to all regions within that PHU.

331 Schools were closed for March Break as of 14 March 2020 and remained closed for the rest of  
 332 the 2019-2020 school year. We use 8 September 2020 as our school reopening date. Workplaces  
 333 were closed on 25 March 2020 and we treat the day the majority of Ontario entered Phase 2 of  
 334 the reopening plan (12 June 2020) as our workplace reopening date. In both cases, reopenings  
 335 occur with NPIs in place to combat SARS-CoV-2 transmission. Schools closed for the Winter  
 336 Break on 21 December 2020. A province-wide shutdown came into effect on 26 December 2020  
 337 and was upgraded to a stay-at-home order on 14 January 2021, wherein Ontario’s population  
 338 was required to remain at home except for essential trips. During February/March 2021 these  
 339 orders began to lift, on 8 February 2021 schools reopened in all PHU except for Toronto, Peel,

340 and York (where schools reopened on 16 February 2021). On 10 February 2021 workplaces  
341 reopened in a small number of PHU (Hastings Prince Edward, Kingston, Frontenac and Lennox  
342 & Addington, and Renfrew County). For the majority of PHU, workplaces reopened on 16  
343 February 2021, with York held back until 22 February 2021 and Toronto, Peel, and North  
344 Bay - Parry Sound until 8 March 2021. We assume that schools in PHU were closed from 21  
345 December 2020 until their February 2021 reopening dates, and likewise that workplaces were  
346 closed from 26 December 2020 until their February/March 2021 reopening dates. Stay-at-home  
347 orders were in effect from 14 January 2021 until the day that the workplaces in a PHU reopened  
348 in February/March 2021.

349 All fitting, simulations, analysis, and visualization are performed in Rstudio (Version 1.2.5019)  
350 using R (Version 4.0.3) [48, 49]. For each scenario we run 5 simulations using each of the 10  
351 best parameter sets (see Parametrisation for details). To meet minimum time requirements to  
352 run the code for the simulations on individual-level efforts using our computing facilities, 10  
353 simulations are run for each of the 10 best parameter sets, for each value of the percentage of  
354 the population adhering to NPIs.

## 355 Parametrisation

356 We set  $\beta_0^{P,A} = 0.5\beta_0^I$ , based on our assumed period of infectiousness and data indicating that  
357 44% of SARS-CoV-2 shedding occurs prior to the onset of symptoms [50]. All parameters not  
358 obtained from the literature are estimated by fitting modelled (1) time series of newly confirmed  
359 cases in each age class (number of individuals in each age class entering  $\{ \cdot, K \}$  states each day)  
360 to data on daily confirmed cases (by reporting date and age) at the provincial level [21]; (2)  
361 time series of PHU-level totals for newly confirmed cases across all age classes (aggregated  
362 from the region-level model output) to data on daily confirmed cases (by reporting date) at the  
363 PHU level [23]; (3) underascertainment ratio (ratio of total cases to confirmed positive cases) at  
364 the provincial level to a empirically estimated underascertainment ratio of 8.76 for the United  
365 States [51]; and (4) individual NPI adherence,  $\xi_k(t)$ , to a real-world proxy - the change in  
366 mobility trends for retail and recreational locations [7]. The percent change in mobility for  
367 these locations (from baseline) is treated as indicative of the percent adherence to NPIs. All  
368 parameters are described in the Supplementary information, Table S1.

369 We employ a 2-stage fitting process, first using a global non-linear optimization algorithm  
370 (Improved Stochastic Ranking Evolution Strategy [27]), and then feeding the results of that

371 process into a second local optimizer algorithm (Constrained Optimization BY Linear Approx-  
372 imations [28]) to refine the solution. Optimization processes are implemented using the Nloptr  
373 package for R [26]. During both stages, the algorithms attempt to minimize the value of a cost  
374 function which incorporates all of the fitting criteria outlined above. As our global algorithm is  
375 stochastic and thus different runs of the fitting process may result in different solutions, we run  
376 the process 1000 times. Parameter distributions for the 10 best parameter sets (i.e. those with  
377 the lowest cost function value at the end of the fitting) are shown in Supplementary informa-  
378 tion, Figure S5, Figure S6, and Figure S7. Output from simulations run using these parameter  
379 sets is shown in Supplementary information, Figure S8, Figure S9, and Figure S10.

## 380 Case fatality ratio

To estimate deaths resulting from COVID-19, we consider 2 scenarios for the crude case fatality ratio (CFR). For the best-case scenario the CFR is calculated using Ontario-specific data [22] at weekly intervals, with the crude CFR in week  $t$  given by

$$(\text{crude CFR})_t = \frac{(\text{Total deaths})_t}{(\text{Total new cases})_{t-2}}. \quad (12)$$

381 A 2-week lag between new cases and deaths is used based on estimates of the interval between  
382 symptom onset and a case being reported in Ontario [21] and of the interval between symptom  
383 onset and death and between case reporting and death [19, 52, 53]. Here, we assume that the  
384 CFR value in week  $t$  holds regardless of the number of new cases.

However, increased strain on the healthcare system [20] may mean that the CFR increases with case numbers [19]. We consider this as an alternative worst-case scenario and fit functions of the form

$$(\text{crude CFR})_t = \delta + \mu (1 - e^{\nu(\text{Total new cases})_{t-2}}) \quad (13)$$

to the crude CFR values calculated for the best-case scenario, over different periods of time. The base CFR is controlled by  $\delta$ , the maximum is  $\delta + \mu$  and  $\nu$  controls the rate at which the CFR increases with case numbers. Based on the clustering of weekly CFR values plotted vs. weekly cases at 2-week lag (Supplementary information, Figure S2) we identify 3 time periods (23 March 2020 to 31 May 2020, 1 June 2020 to 16 August 2020, 17 August 2020 to 28 February 2021) during which the relationship between new cases and the CFR appeared distinct. Using these groups of points we fit parameter values for Equation 13. When fitting,

we assume that  $\delta$  must be no smaller than the lowest calculated CFR value (approx. 0.0025), and that  $\delta + \mu \leq 0.2$  based on national-level CFR values [54]. For the 23 March 2020 to 31 May 2020 period we exclude from the fitting 3 points corresponding to weeks early in the pandemic where reporting issues result in unusually high CFR values. Fitted values of  $(\delta, \mu, \nu)$  for our 3 time periods are (0.01226, 0.1877, 0.0001832), (0.002500, 0.1975, 0.00008455), and (0.009264, 0.1113, 0.00008747) respectively. Estimated deaths are calculated as

$$(\text{Deaths})_t = (\text{crude CFR})_t (\text{Total new cases})_{t-2}. \quad (14)$$

385 To evaluate the accuracy of our CFR functions, we apply them to data on cases in the province  
386 (Supplementary information, Figure S11) and find a reasonable level of agreement between  
387 reported deaths and deaths calculated using Equation 13.

## 388 **Extension to individual-level NPI adherence**

389 In our base model, Equation 2 captures, at the population level, how the proportion of the  
390 population who adhere to NPIs changes in response to case prevalence. Here, we examine NPI  
391 adherence at a more granular level. We consider a population where each individual either  
392 adheres or does not adhere to NPIs, and does not switch their behaviour during the simulation.  
393 We limit this experiment to our first time period (10 March 2020 to 15 August 2020) as over a  
394 longer time period we would expect some individuals to change their adherence.

395 Within this model extension some constant proportion,  $x$ , of the population does not adhere  
396 to NPIs (with the remaining  $1 - x$  adhering). This is achieved by adding a third state variable,  
397  $B_i^j$ , for NPI adherence, so the state of individual  $i$  in age class  $j$  is  $\{D_i^j, T_i^j, B_i^j\}$ . Thus,  $B_i^j \in$   
398  $\{C^j, N^j\}$  for individuals who are, respectively, adhering and not adhering to NPIs. Non-  
399 adherent individuals are seeded throughout the population, with the number of non-adherent  
400 individuals within age class  $j$  in region  $k$  proportional to the number of individuals within  
401 that age class in that region. The seeding of infections within the population allows for both  
402 adherent and non-adherent individuals to be amongst those initially infected.

For every interaction between a susceptible individual and an infectious individual there are 4 possibilities for NPI adherence; both parties are adherent ( $CC$ ), neither party is adherent ( $NN$ ), the susceptible individual is adherent but the infectious individual is not ( $CN$ ) and vice versa ( $NC$ ). When both parties are adherent, the proportion of contacts remaining (replacing



Equation 5) is:

$$F_{ij,k}^{CC}(t) = n_{ij}^w (1 - C_k^w(t)) + n_{ij}^s (1 - C_k^s(t)) + n_{ij}^h (1 - \epsilon_h) + n_{ij}^o (1 - \epsilon_o). \quad (15)$$

If neither party is adherent the remaining fraction of contacts for a susceptible individual is:

$$F_{ij,k}^{NN}(t) = n_{ij}^w (1 - C_k^w(t)) + n_{ij}^s (1 - C_k^s(t)) + n_{ij}^h + n_{ij}^o, \quad (16)$$

403 with no reduction in contacts in either of the “home” or “other” locations.

When only one party is adhering to NPIs ( $CN$  or  $NC$ ) the efficacy of NPI adherence in reducing contacts depends on which party is adherent. When only the susceptible is adherent the remaining fraction of contacts is:

$$F_{ij,k}^{CN}(t) = n_{ij}^w (1 - C_k^w(t)) + n_{ij}^s (1 - C_k^s(t)) + n_{ij}^h (1 - \theta \epsilon_h) + n_{ij}^o (1 - \theta \epsilon_o) \quad (17)$$

while when only the infectious individual is adherent the remaining fraction of contacts is:

$$F_{ij,k}^{NC}(t) = n_{ij}^w (1 - C_k^w(t)) + n_{ij}^s (1 - C_k^s(t)) + n_{ij}^h (1 - (1 - \theta) \epsilon_h) + n_{ij}^o (1 - (1 - \theta) \epsilon_o) \quad (18)$$

404 where  $\theta \in [0, 1]$  indicates the relative importance of the susceptible’s choice to adhere with  
 405 NPIs. For simplicity, we assume  $\theta = 0.5$  meaning the adherence of the susceptible and infectious  
 406 individual are equally important and  $F_{ij,k}^{CN}(t) = F_{ij,k}^{NC}(t)$ .

407 During the simulation, adherent susceptibles experience an infection probability:

$$\lambda_{i,k}^C(t) = 1 - \left( \prod_{D^j, T^j, C^j} [1 - F_{ij,k}^{CC}(t) f_T \beta_{i,k}^D]^{P_{t,k}^{*D^j T^j C^j}} \prod_{D^j, T^j, N^j} [1 - F_{ij,k}^{CN}(t) f_T \beta_{i,k}^D]^{P_{t,k}^{*D^j T^j N^j}} \right) \quad (19)$$

while non-adherent susceptibles experience an infection probability:

$$\lambda_{i,k}^N(t) = 1 - \left( \prod_{D^j, T^j, C^j} [1 - F_{ij,k}^{NC}(t) f_T \beta_{i,k}^D]^{P_{t,k}^{*D^j T^j C^j}} \prod_{D^j, T^j, N^j} [1 - F_{ij,k}^{NN}(t) f_T \beta_{i,k}^D]^{P_{t,k}^{*D^j T^j N^j}} \right). \quad (20)$$

## 408 Data availability

409 Data sets required to run simulations are available in a GitHub repository (<https://github.com/k3fair/COVID-19-ON-model>). Data sets generated from our analysis and simulations are  
410 available from the corresponding author upon reasonable request. All epidemiological [21–23],  
411 testing [21–23], demographic [24], travel [25], and mobility data [7] used to parametrise the  
412 model are publicly available online.  
413

## 414 Code availability

415 Code used for parameter fitting and simulations is available in a GitHub repository (<https://github.com/k3fair/COVID-19-ON-model>). Code used for analysis and visualization is avail-  
416 able from the corresponding author upon reasonable request.  
417

## 418 References

- 419 1. Halloran, M. E. *et al.* Modeling targeted layered containment of an influenza pandemic  
420 in the United States. *Proceedings of the National Academy of Sciences* **105**, 4639–4644  
421 (2008).
- 422 2. Peak, C. M. *et al.* Individual quarantine versus active monitoring of contacts for the  
423 mitigation of COVID-19: a modelling study. *The Lancet Infectious Diseases* **20**, 1025–  
424 1033 (2020).
- 425 3. Hale, T. *et al.* A global panel database of pandemic policies (Oxford COVID-19 Govern-  
426 ment Response Tracker). *Nature Human Behaviour*, 1–10 (2021).
- 427 4. Brauner, J. M. *et al.* Inferring the effectiveness of government interventions against COVID-  
428 19. *Science* **371** (2021).
- 429 5. Li, Y. *et al.* The temporal association of introducing and lifting non-pharmaceutical in-  
430 terventions with the time-varying reproduction number (R) of SARS-CoV-2: a modelling  
431 study across 131 countries. *The Lancet Infectious Diseases* **21**, 193–202 (2021).
- 432 6. Claeson, M. & Hanson, S. COVID-19 and the Swedish enigma. *The Lancet* **397**, 259–261  
433 (2021).

- 434 7. Google LLC. *Google COVID-19 Community Mobility Reports*. <https://www.google.com/covid19/mobility/> Accessed: March 2, 2021. 2021.
- 435
- 436 8. Tuite, A. R., Greer, A. L., De Keninck, S. & Fisman, D. N. Risk for COVID-19 resurgence  
437 related to duration and effectiveness of physical distancing in Ontario, Canada. *Annals of*  
438 *Internal Medicine* **173**, 675–678 (2020).
- 439 9. Tuite, A. R., Fisman, D. N. & Greer, A. L. Mathematical modelling of COVID-19 trans-  
440 mission and mitigation strategies in the population of Ontario, Canada. *CMAJ* **192**,  
441 E497–E505 (2020).
- 442 10. Moyles, I. R., Heffernan, J. M. & Kong, J. D. Cost and social distancing dynamics in  
443 a mathematical model of COVID-19 with application to Ontario, Canada. *Royal Society*  
444 *Open Science* **8**, 201770 (2021).
- 445 11. Tang, B. *et al.* De-escalation by reversing the escalation with a stronger synergistic package  
446 of contact tracing, quarantine, isolation and personal protection: feasibility of preventing  
447 a COVID-19 rebound in Ontario, Canada, as a case study. *Biology* **9**, 100 (2020).
- 448 12. Arino, J. & Portet, S. A simple model for COVID-19. *Infectious Disease Modelling* **5**,  
449 309–315 (2020).
- 450 13. Abdollahi, E., Haworth-Brockman, M., Keynan, Y., Langley, J. M. & Moghadas, S. M.  
451 Simulating the effect of school closure during COVID-19 outbreaks in Ontario, Canada.  
452 *BMC medicine* **18**, 1–8 (2020).
- 453 14. Magli, A. C., d’Onofrio, A. & Manfredi, P. Deteriorated Covid19 control due to delayed  
454 lockdown resulting from strategic interactions between Governments and oppositions.  
455 Preprint at <https://doi.org/10.1101/2020.05.26.20112946> (2020).
- 456 15. Phillips, B., Anand, M. & Bauch, C. T. Spatial early warning signals of social and epi-  
457 demiological tipping points in a coupled behaviour-disease network. *Scientific reports* **10**,  
458 1–12 (2020).
- 459 16. Karatayev, V. A., Anand, M. & Bauch, C. T. Local lockdowns outperform global lockdown  
460 on the far side of the COVID-19 epidemic curve. *Proceedings of the National Academy of*  
461 *Sciences* **117**, 24575–24580 (2020).
- 462 17. Jentsch, P. C., Anand, M. & Bauch, C. T. Prioritising COVID-19 vaccination in chang-  
463 ing social and epidemiological landscapes: a mathematical modelling study. *The Lancet*  
464 *Infectious Diseases* (2021).

- 465 18. Hellewell, J. *et al.* Feasibility of controlling COVID-19 outbreaks by isolation of cases and  
466 contacts. *The Lancet Global Health* **8**, e488–e496 (2020).
- 467 19. Abdollahi, E., Champredon, D., Langley, J. M., Galvani, A. P. & Moghadas, S. M. Tem-  
468 poral estimates of case-fatality rate for COVID-19 outbreaks in Canada and the United  
469 States. *Cmaj* **192**, E666–E670 (2020).
- 470 20. Bravata, D. M. *et al.* Association of intensive care unit patient load and demand with  
471 mortality rates in US Department of Veterans Affairs hospitals during the COVID-19  
472 pandemic. *JAMA network open* **4**, e2034266–e2034266 (2021).
- 473 21. Ontario Agency for Health Protection and Promotion (Public Health Ontario). *Con-*  
474 *firmed positive cases of COVID-19 in Ontario*. [https://data.ontario.ca/dataset/  
475 confirmed-positive-cases-of-covid-19-in-ontario](https://data.ontario.ca/dataset/confirmed-positive-cases-of-covid-19-in-ontario) Accessed: March 3, 2021. 2021.
- 476 22. Ontario Agency for Health Protection and Promotion (Public Health Ontario). *Status of*  
477 *COVID-19 cases in Ontario*. [https://data.ontario.ca/dataset/status-of-covid-  
478 19-cases-in-ontario](https://data.ontario.ca/dataset/status-of-covid-19-cases-in-ontario) Accessed: March 4, 2021. 2021.
- 479 23. Ontario Agency for Health Protection and Promotion (Public Health Ontario). *Ontario*  
480 *COVID-19 Data Tool: Case trends*. [https://www.publichealthontario.ca/en/data-  
481 and-analysis/infectious-disease/covid-19-data-surveillance/covid-19-data-  
482 tool?tab=trends](https://www.publichealthontario.ca/en/data-and-analysis/infectious-disease/covid-19-data-surveillance/covid-19-data-tool?tab=trends) Accessed: March 4, 2021. 2021.
- 483 24. Statistics Canada. *Statistics Canada Catalogue no. 98-316-X2016001*. [http://www12.  
484 statcan.gc.ca/census-recensement/2016/dp-pd/prof/index.cfm?Lang=E](http://www12.statcan.gc.ca/census-recensement/2016/dp-pd/prof/index.cfm?Lang=E) Accessed:  
485 Sept 25, 2020. 2017.
- 486 25. Statistics Canada. *2016 census, catalogue no. 98-400-x2016391*. [https://www150.statcan.  
487 gc.ca/n1/en/catalogue/98-400-X2016391](https://www150.statcan.gc.ca/n1/en/catalogue/98-400-X2016391) Accessed: Sept 1, 2020. 2016.
- 488 26. Johnson, S. G. The NLOpt nonlinear-optimization package. [http://github.com/stevengj/  
489 nlopt](http://github.com/stevengj/nlopt).
- 490 27. Runarsson, T. P. & Yao, X. Search biases in constrained evolutionary optimization. *IEEE*  
491 *Transactions on Systems, Man, and Cybernetics, Part C (Applications and Reviews)* **35**,  
492 233–243 (2005).
- 493 28. Powell, M. J. in *Advances in optimization and numerical analysis* 51–67 (Springer, 1994).

- 494 29. Ontario Agency for Health Protection and Promotion (Public Health Ontario). *COVID-19*  
495 *(coronavirus) in Ontario*. <https://covid-19.ontario.ca/data/> Accessed: March 3,  
496 2021. 2021.
- 497 30. Reluga, T. C. Game theory of social distancing in response to an epidemic. *PLoS Comput*  
498 *Biol* **6**, e1000793 (2010).
- 499 31. Oraby, T., Thampi, V. & Bauch, C. T. The influence of social norms on the dynamics of  
500 vaccinating behaviour for paediatric infectious diseases. *Proceedings of the Royal Society*  
501 *B: Biological Sciences* **281**, 20133172 (2014).
- 502 32. Li, M., Taylor, E. G., Atkins, K. E., Chapman, G. B. & Galvani, A. P. Stimulating  
503 influenza vaccination via prosocial motives. *PloS one* **11**, e0159780 (2016).
- 504 33. Fisman, D. N., Bogoch, I., Lapointe-Shaw, L., McCready, J. & Tuite, A. R. Risk factors  
505 associated with mortality among residents with coronavirus disease 2019 (COVID-19) in  
506 long-term care facilities in Ontario, Canada. *JAMA network open* **3**, e2015957–e2015957  
507 (2020).
- 508 34. Gardner, W., States, D. & Bagley, N. The coronavirus and the risks to the elderly in  
509 long-term care. *Journal of Aging & Social Policy* **32**, 310–315 (2020).
- 510 35. Government of Ontario. *COVID-19 response framework: keeping Ontario safe and open*.  
511 [https://www.ontario.ca/page/covid-19-response-framework-keeping-ontario-](https://www.ontario.ca/page/covid-19-response-framework-keeping-ontario-safe-and-open)  
512 [safe-and-open](https://www.ontario.ca/page/covid-19-response-framework-keeping-ontario-safe-and-open) Accessed: March 25, 2021. 2021.
- 513 36. CDC. *Severe Outcomes Among Patients with Coronavirus Disease 2019 (COVID-19) —*  
514 *United States, February 12–March 16, 2020*. [https://www.cdc.gov/mmwr/volumes/69/](https://www.cdc.gov/mmwr/volumes/69/wr/mm6912e2.htm)  
515 [wr/mm6912e2.htm](https://www.cdc.gov/mmwr/volumes/69/wr/mm6912e2.htm) Accessed: August 6, 2020. 2020.
- 516 37. Soud, F. *et al.* Isolation compliance among university students during a mumps outbreak,  
517 Kansas 2006. *Epidemiology & Infection* **137**, 30–37 (2009).
- 518 38. Lloyd-Smith, J. O., Schreiber, S. J., Kopp, P. E. & Getz, W. M. Superspreading and the  
519 effect of individual variation on disease emergence. *Nature* **438**, 355–359 (2005).
- 520 39. Prem, K. *et al.* Projecting contact matrices in 177 geographical regions: an update and  
521 comparison with empirical data for the COVID-19 era. Preprint at [https://doi.org/](https://doi.org/10.1101/2020.07.22.20159772)  
522 [10.1101/2020.07.22.20159772](https://doi.org/10.1101/2020.07.22.20159772) (2020).
- 523 40. Bish, A. & Michie, S. Demographic and attitudinal determinants of protective behaviours  
524 during a pandemic: A review. *British journal of health psychology* **15**, 797–824 (2010).

- 525 41. Wise, T., Zbozinek, T. D., Michelini, G., Hagan, C. C. & Mobbs, D. Changes in risk  
526 perception and self-reported protective behaviour during the first week of the COVID-19  
527 pandemic in the United States. *Royal Society open science* **7**, 200742 (2020).
- 528 42. Coroiu, A., Moran, C., Campbell, T. & Geller, A. C. Barriers and facilitators of adher-  
529 ence to social distancing recommendations during COVID-19 among a large international  
530 sample of adults. *PloS one* **15**, e0239795 (2020).
- 531 43. Crane, M. A., Shermock, K. M., Omer, S. B. & Romley, J. A. Change in reported adher-  
532 ence to nonpharmaceutical interventions during the COVID-19 pandemic, April–November  
533 2020. *JAMA* **325**, 883–885 (2021).
- 534 44. Merow, C. & Urban, M. C. Seasonality and uncertainty in global COVID-19 growth rates.  
535 *Proceedings of the National Academy of Sciences* **117**, 27456–27464 (2020).
- 536 45. Ontario Ministry of Health. *COVID-19 Guidance for the Health Sector: March 5, 2021*.  
537 [https://www.health.gov.on.ca/en/pro/programs/publichealth/coronavirus/  
538 2019\\_guidance.aspx](https://www.health.gov.on.ca/en/pro/programs/publichealth/coronavirus/2019_guidance.aspx) Accessed: March 24, 2021. 2021.
- 539 46. Wu, Z. & McGoogan, J. M. Characteristics of and important lessons from the coronavirus  
540 disease 2019 (COVID-19) outbreak in China: summary of a report of 72 314 cases from  
541 the Chinese Center for Disease Control and Prevention. *Jama* **323**, 1239–1242 (2020).
- 542 47. Covid, C. *et al.* Coronavirus disease 2019 in children—United States, february 12–april 2,  
543 2020. *Morbidity and Mortality Weekly Report* **69**, 422 (2020).
- 544 48. RStudio Team. *RStudio: Integrated Development Environment for R*. RStudio, PBC.  
545 (Boston, MA, 2020). <http://www.rstudio.com/>.
- 546 49. R Core Team. *R: A Language and Environment for Statistical Computing*. R Foundation  
547 for Statistical Computing (Vienna, Austria, 2020). <https://www.R-project.org/>.
- 548 50. He, X. *et al.* Temporal dynamics in viral shedding and transmissibility of COVID-19.  
549 *Nature medicine* **26**, 672–675 (2020).
- 550 51. Jagodnik, K. M., Ray, F., Giorgi, F. M. & Lachmann, A. Correcting under-reported  
551 COVID-19 case numbers. Preprint at <https://doi.org/10.1101/2020.03.14.20036178>  
552 (2020).
- 553 52. Verity, R. *et al.* Estimates of the severity of coronavirus disease 2019: a model-based  
554 analysis. *The Lancet infectious diseases* **20**, 669–677 (2020).

- 555 53. Imperial College COVID-19 response team. *Short-term forecasts of COVID-19 deaths in*  
556 *multiple countries*. [https://mrc-ide.github.io/covid19-short-term-forecasts/](https://mrc-ide.github.io/covid19-short-term-forecasts/index.html)  
557 [index.html](https://mrc-ide.github.io/covid19-short-term-forecasts/index.html) Accessed: March 7, 2021. 2021.
- 558 54. Johns Hopkins University & Medicine. *Mortality Analyses*. [https://coronavirus.jhu.](https://coronavirus.jhu.edu/data/mortality)  
559 [edu/data/mortality](https://coronavirus.jhu.edu/data/mortality) Accessed: March 25, 2021. 2021.

## 560 **Acknowledgements**

561 This research was funded by grants from the Ontario Ministry of Colleges and Universities and  
562 the Natural Sciences and Engineering Research Council of Canada (NSERC) Alliance program  
563 (to M.A. and C.T.B.). Additionally, the research was made possible by the facilities of the  
564 Shared Hierarchical Academic Research Computing Network (SHARCNET: [www.sharcnet.ca](http://www.sharcnet.ca))  
565 and Compute/Calcul Canada.

## 566 **Author information**

### 567 **Contributions**

568 C.T.B. and M.A. conceived the study, K.R.F., V.A.K., M.A., and C.T.B. developed the model  
569 and methods, K.R.F. and C.T.B. wrote and edited the manuscript, V.A.K. provided comments  
570 on the manuscript, V.A.K. and K.R.F. developed simulation code, and K.R.F. performed all  
571 simulations and analysis.

### 572 **Correspondence**

573 Correspondence and material requests should be addressed to Kathryn R. Fair.

### 574 **Competing interests**

575 The authors declare no competing interests.

### Travel between regions

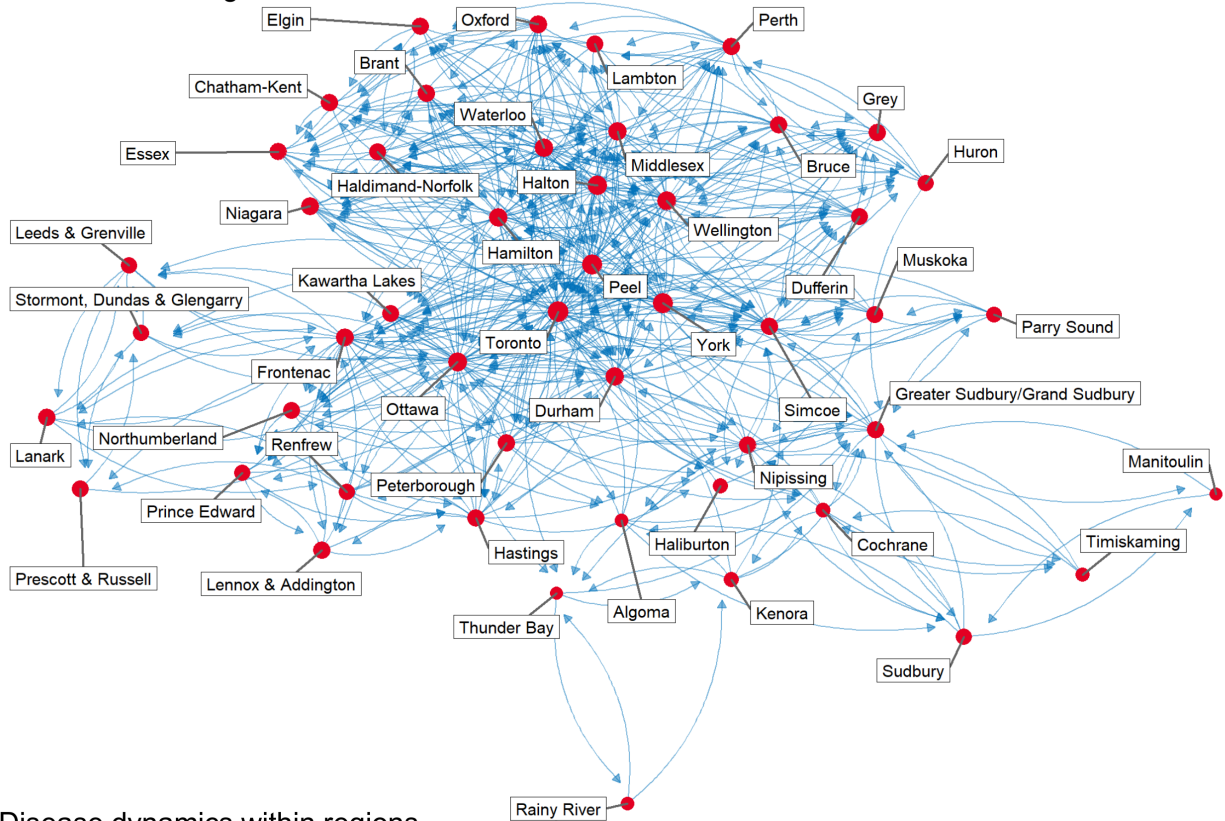

### Disease dynamics within regions

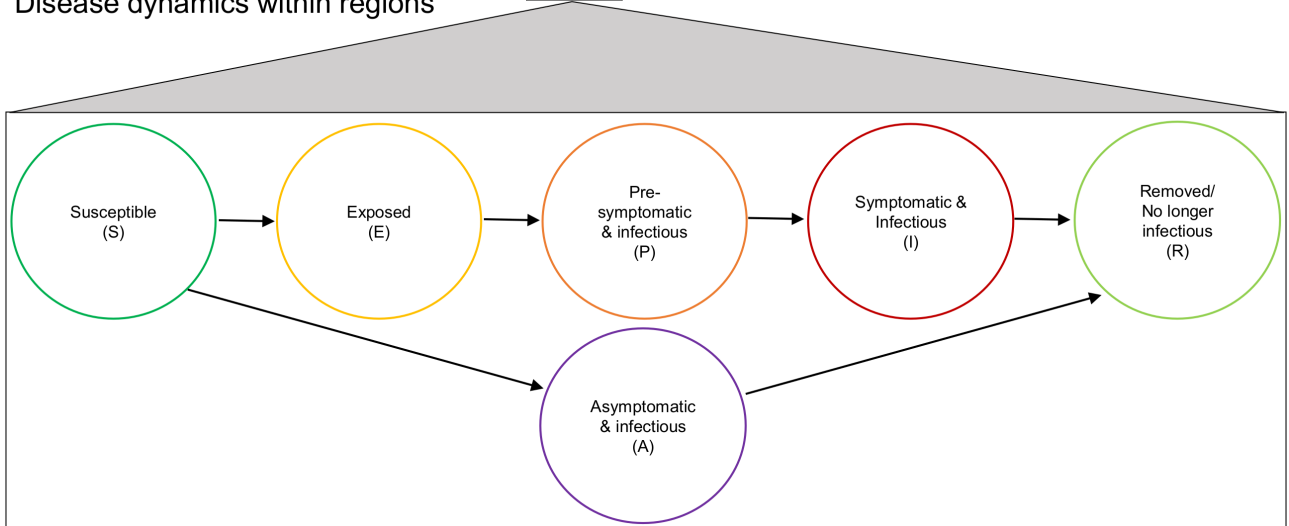

**Figure 1.** Schematic representation of transmission model. Note that the epidemiological compartments were stratified by age as well as location (see Methods).



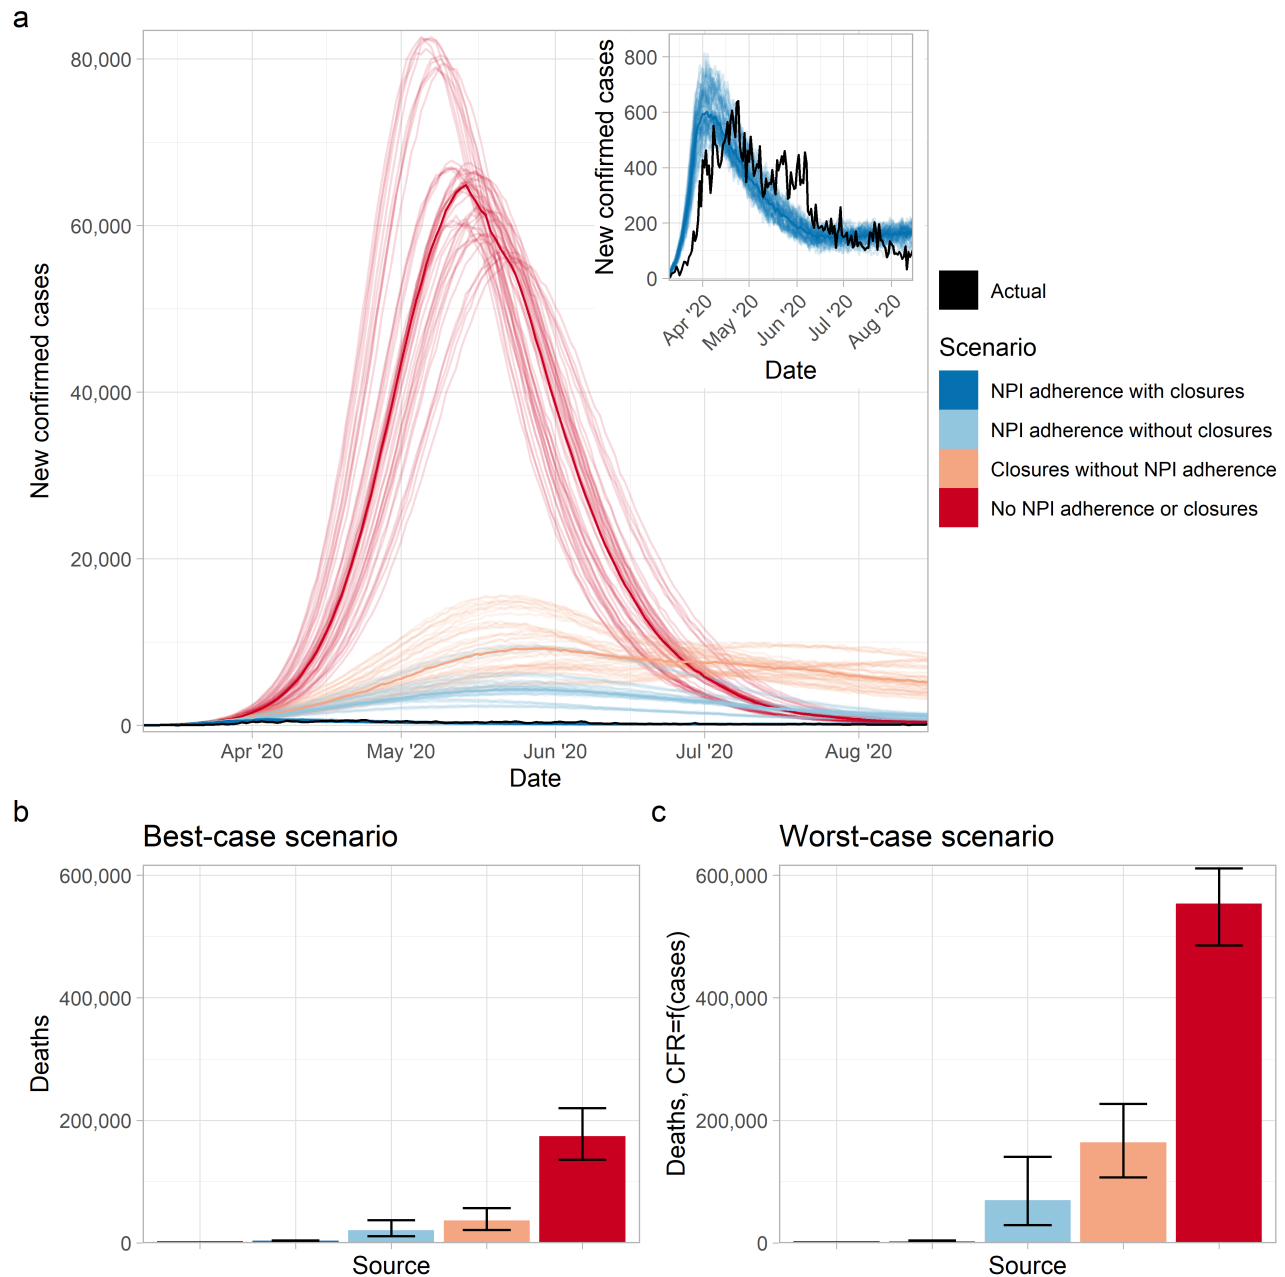

**Figure 2. NPIs significantly reduced cases and deaths in the first wave.** Figure panels show (a) new confirmed cases by day, and mean projected deaths from 10 March 2020 to 15 August 2020 in (b) the best-case scenario (values from left-right are: 2,789, 3,383, 20,728, 36,782, 174,411) and (c) worst-case scenario (values from left-right are: 2,789, 2,797, 69,590, 164,311, 553,460) for healthcare system functioning in a regime of very high case incidence. Transparent lines in panel (a) correspond to different stochastic realizations of model runs, with solid lines corresponding to the median value across all realizations. Error bars in panels (b,c) represent the minimal and maximal values across all stochastic realizations. Model parameter settings appear in Supplementary information, Table S1.

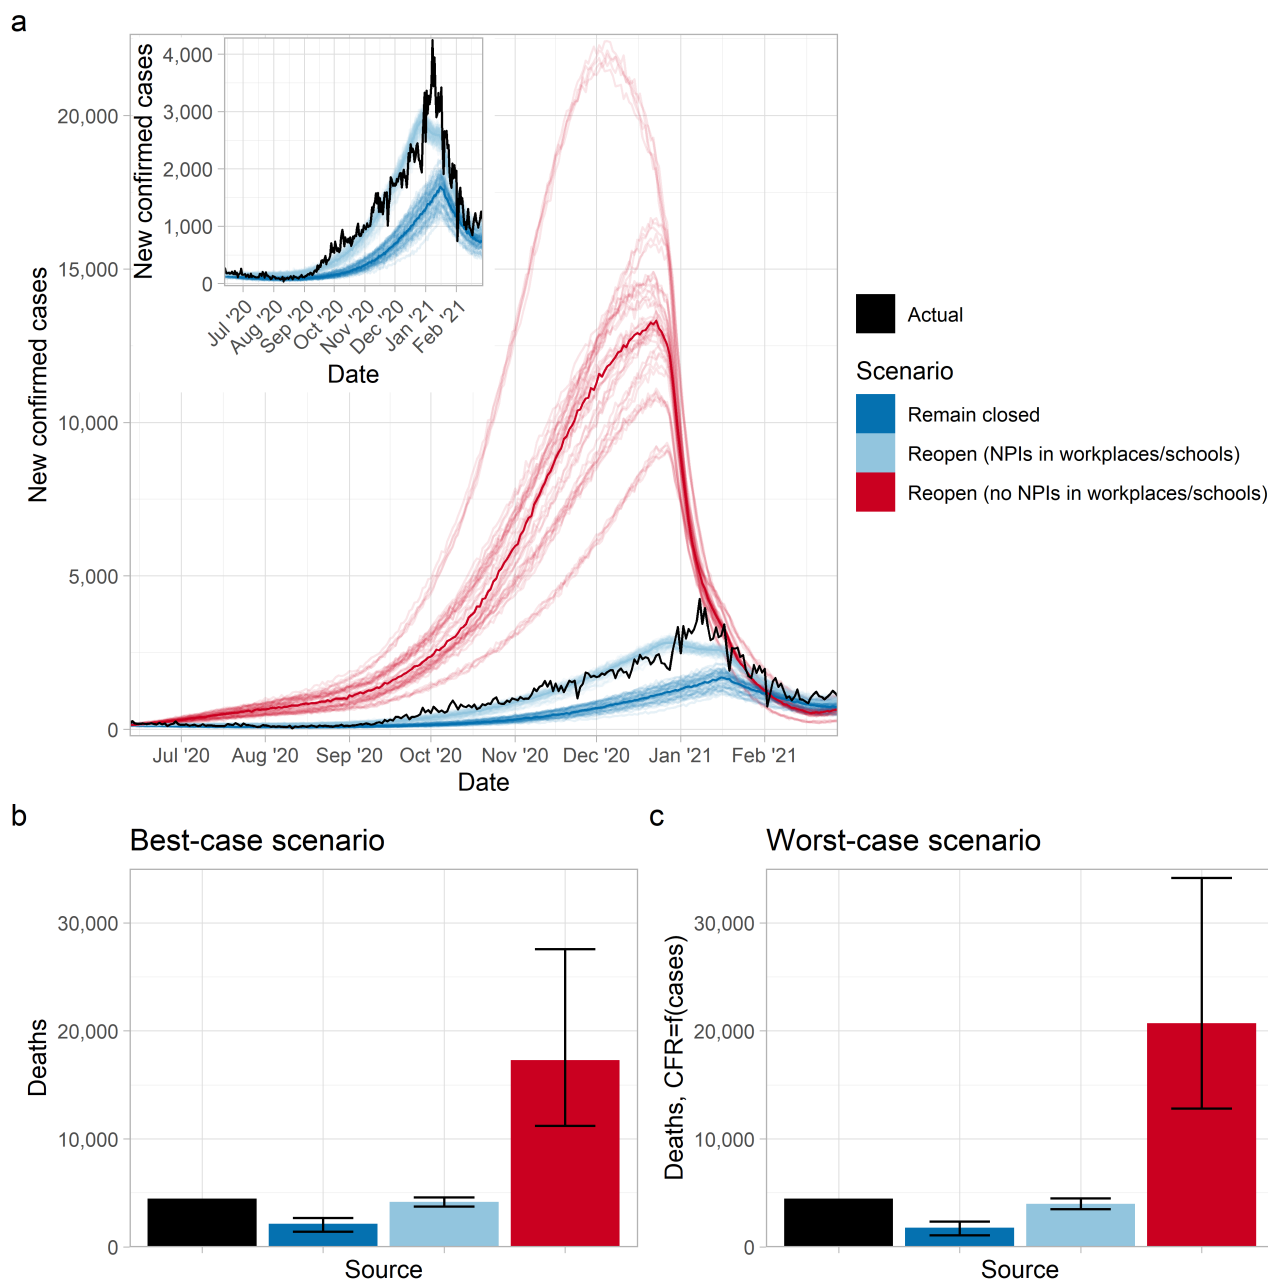

**Figure 3. NPIs significantly reduced cases and deaths in the second wave.** Figure panels show (a) new confirmed cases by day, and mean projected deaths from 12 June 2020 to 28 February 2021 in (b) the best-case scenario (values from left-right are: 4, 493, 2, 154, 4, 167, 17, 291) and (c) worst-case scenario (values from left-right are: 4, 493, 1, 785, 3, 991, 20, 709) for healthcare system functioning in a regime of very high case incidence. Transparent lines in panel (a) correspond to different stochastic realizations of model runs, with solid lines corresponding to the median value across all realizations. Error bars in panels (b,c) represent the minimal and maximal values across all stochastic realizations. Model parameter settings appear in Supplementary information, Table S1.

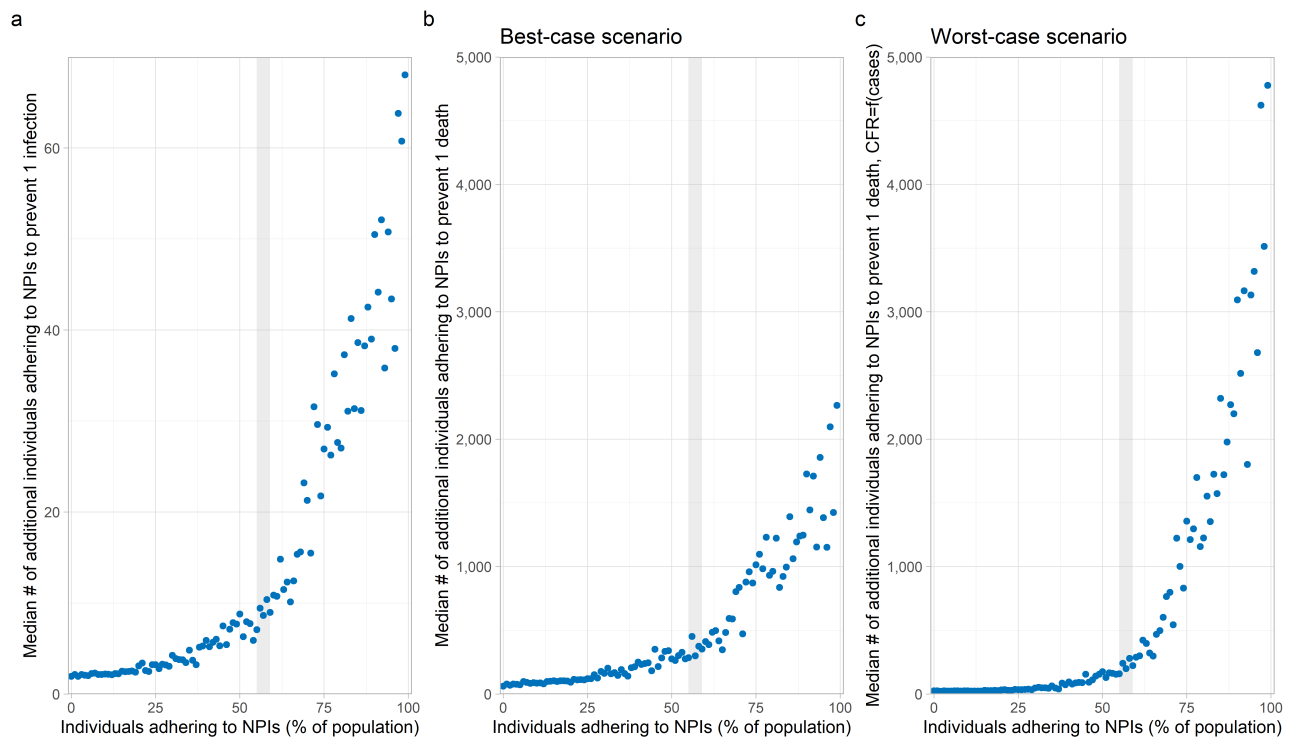

**Figure 4. Impact of individual efforts.** Figure panels show the incremental median number of individuals who needed to adopt NPIs in order to prevent (a) one infection, and one death under (b) the best-case scenario and (c) worst-case scenario for healthcare system functioning in a regime of very high case incidence, for the first wave (10 March to 15 August 2020). The shaded region demarcates the estimated range in the percentage of individuals adhering to NPIs over that time-period (see Supplementary information, Figure S3). Model parameter settings appear in Supplementary information, Table S1.
